# Supplementary material for: Assessment of T-cell receptor repertoire and clonal expansion in peripheral T-cell lymphoma using RNA-seq data
Source: PubMed Central journal article supplement (PMC5595876; doi:10.1038/s41598-017-11310-0), 2017-09-12
Supplement: 41598_2017_11310_MOESM1_ESM.pdf [file 41598_2017_11310_MOESM1_ESM.pdf]

## **Assessment of T-cell receptor repertoire and clonal expansion in peripheral T-cell lymphoma using RNA-seq data**

Qiang Gong<sup>1,7</sup>, Chao Wang<sup>1,2,3,7</sup>, Weiwei Zhang<sup>2,7</sup>, Javeed Iqbal<sup>2</sup>, Yang Hu<sup>2</sup>, Timothy C. Greiner<sup>2</sup>, Adam Cornish<sup>2</sup>, Jo-Heon Kim<sup>1,4</sup>, Raul Rabadan<sup>5</sup>, Francesco Abate<sup>5</sup>, Xin Wang<sup>3</sup>, Giorgio G. Inghirami<sup>6</sup>, Timothy W. McKeithan<sup>1</sup>, Wing C. Chan<sup>1\*</sup>

<sup>1</sup>Department of Pathology, City of Hope National Medical Center, Duarte, CA; <sup>2</sup>Department of Pathology and Microbiology, University of Nebraska Medical Center, Omaha, NE; <sup>3</sup>Department of Hematology, Shandong Provincial Hospital affiliated to Shandong University, Jinan, P.R. China; <sup>4</sup>Department of Pathology, Chonnam National University Medical School and Research Institute of Medical Sciences, Gwangju, South Korea; <sup>5</sup>Department of Biomedical Informatics, Columbia University, New York, NY; <sup>6</sup>Department of Pathology and Laboratory Medicine, Weill Cornell Medical College, New York, NY; <sup>7</sup>These authors contributed equally.

### **List of supplementary figures and tables:**

- Figure S1 Cutoffs for clonal assessment.
- Figure S2 Number of reads from EBV genomes in each sample.
- Figure S3 TCR-V $\gamma$  transcription levels in a  $\gamma\delta$ -T cell lymphoma case.
- Figure S4 Usage of TCR-V $\beta$  in normal effector T and native T cells.
- Table S1 List of samples used in this study.
- Table S2 Clonal assessment based on TCR CDR3 sequences and variable segment usage.
- Table S3 List of samples with biallelic TCR strands.

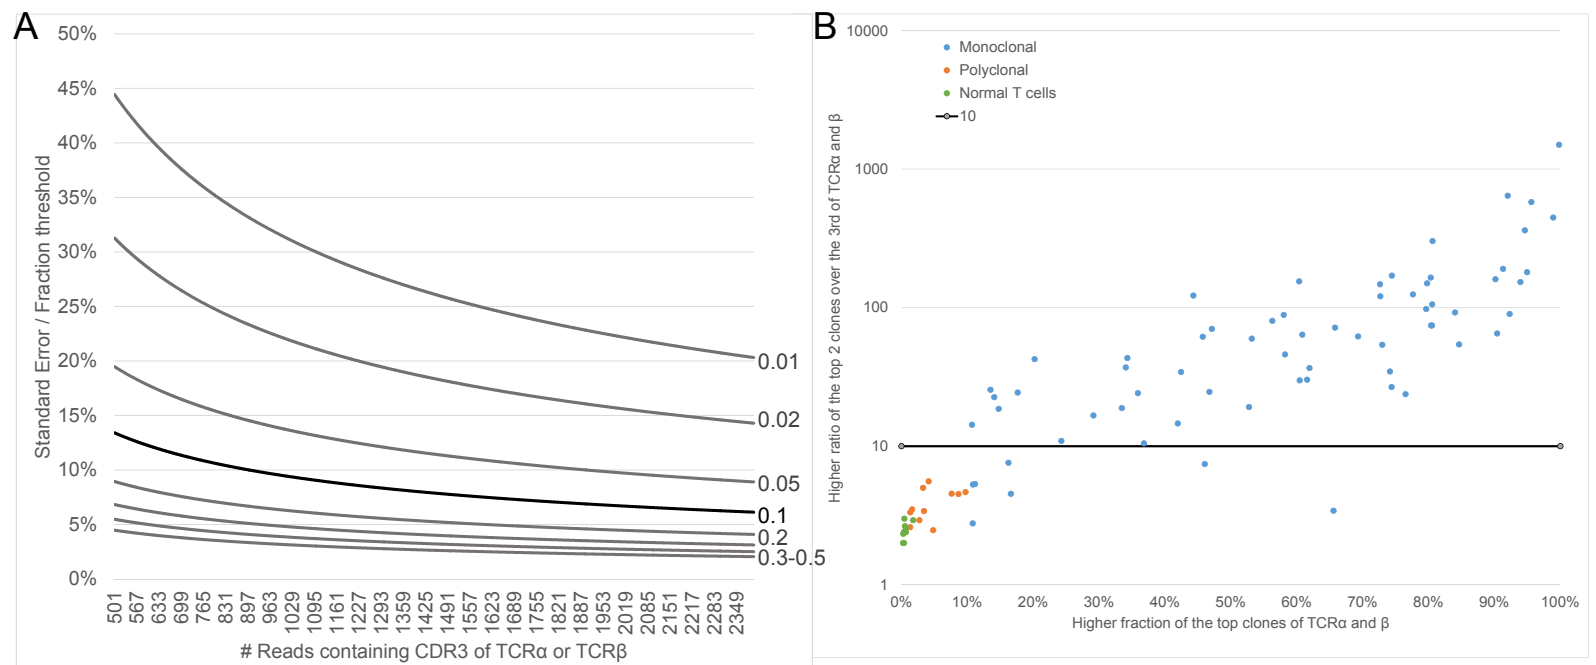

Figure S1. Cutoffs for clonal assessment. A) Distribution of ratio of standard errors and the percentage cutoff above which a clone was considered clonal. B) Distribution of fraction of the largest two clones and their ratio over the third largest clones.

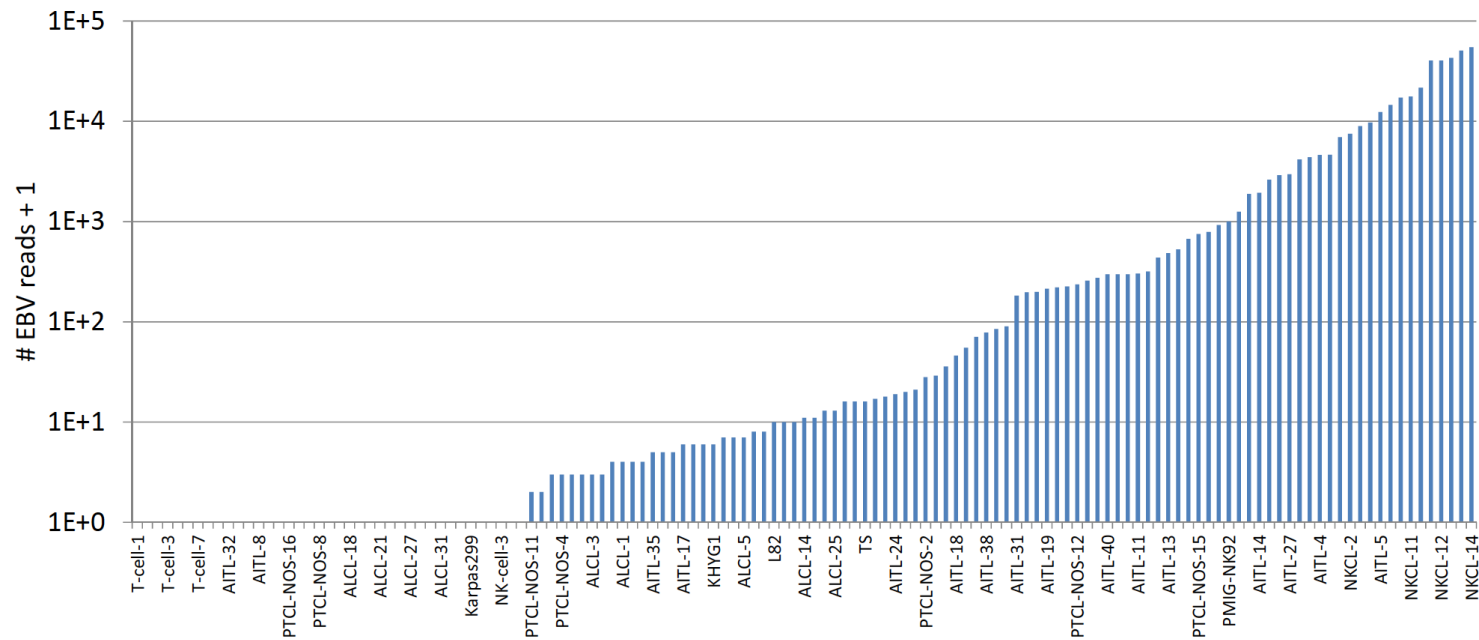

Figure S2 Number of reads from EBV genomes in each sample.

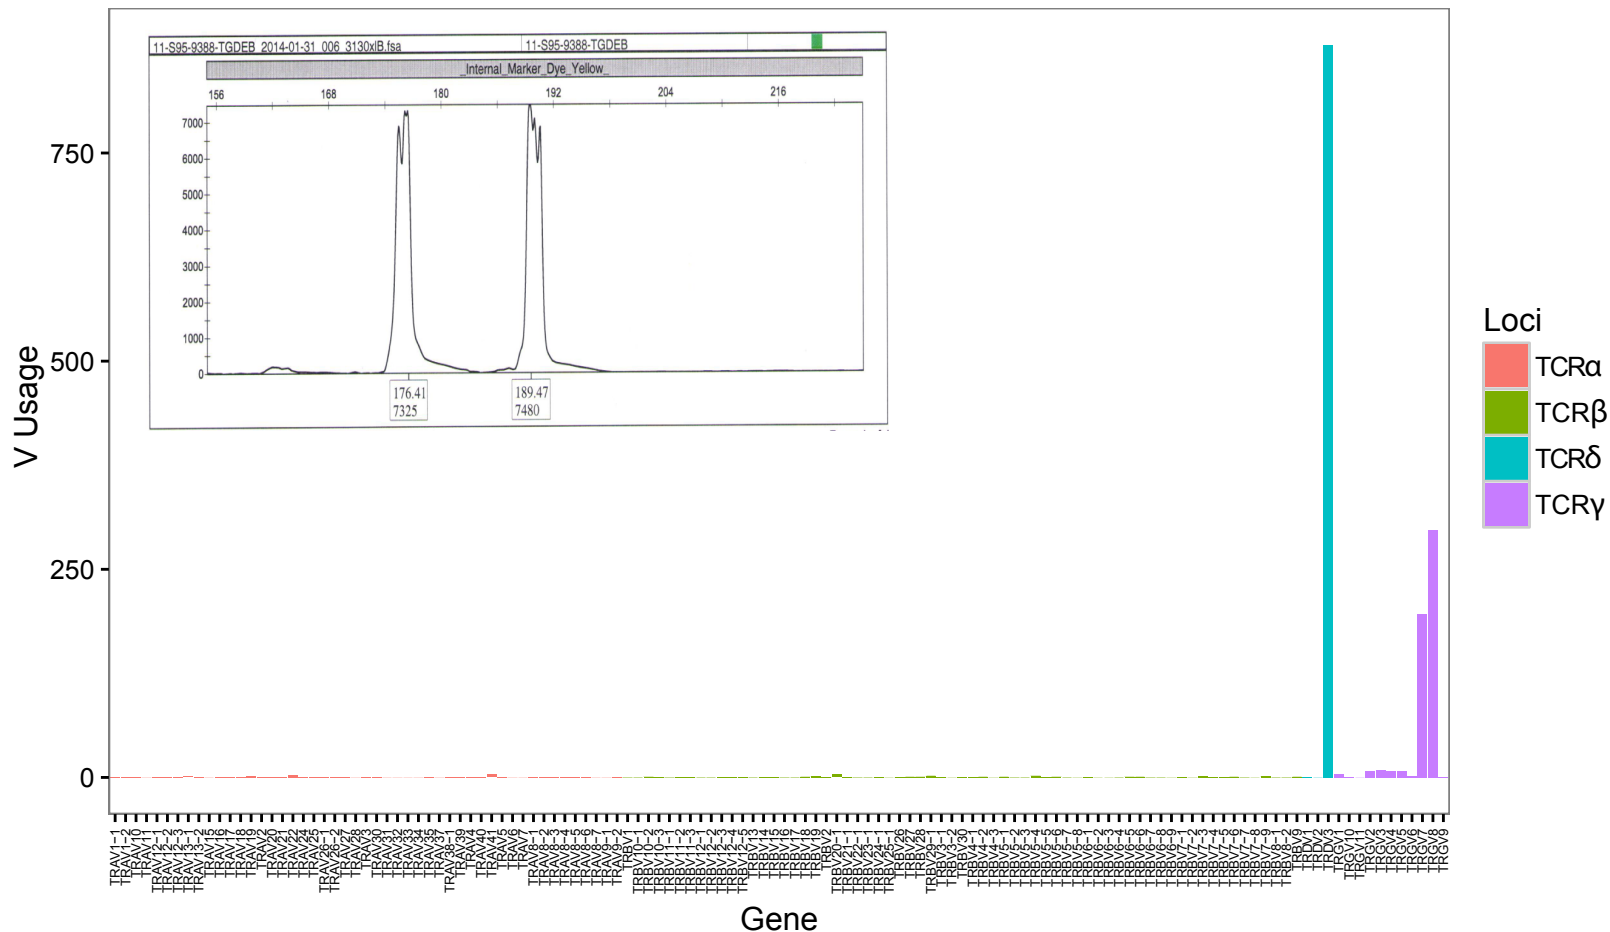

Figure S3 TCR-V $\gamma$  transcription levels in a  $\gamma\delta$ -T cell lymphoma case. The barplot shows usage of TCR-V $\alpha$ , TCR-V $\beta$ , TCR-V $\gamma$ , and TCR-V $\delta$  as determined on RNA-seq data. The inner panel shows the peaks of the PCR results of the TCR $\gamma$  chain.

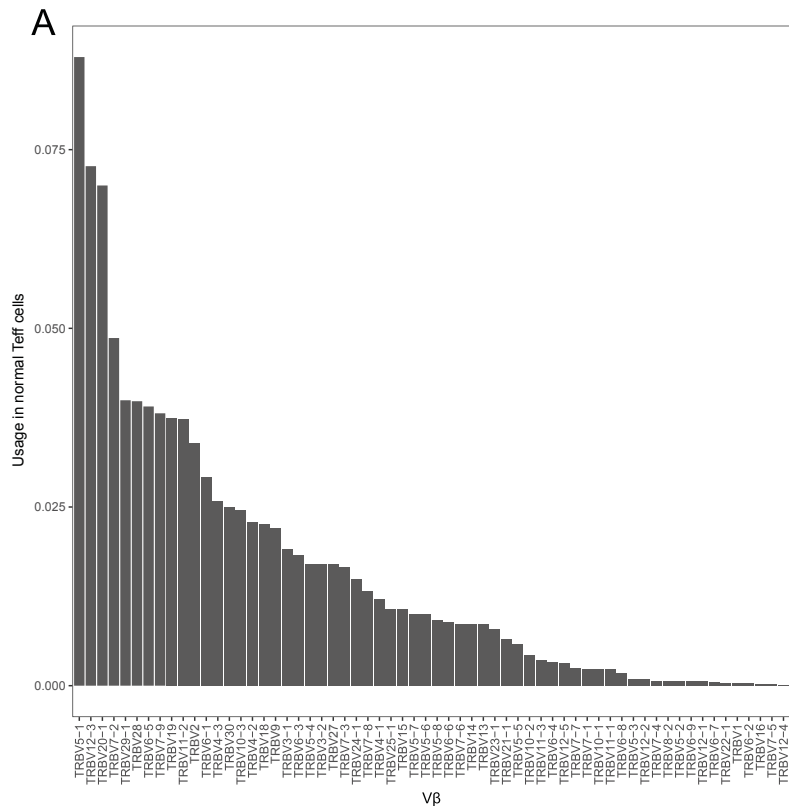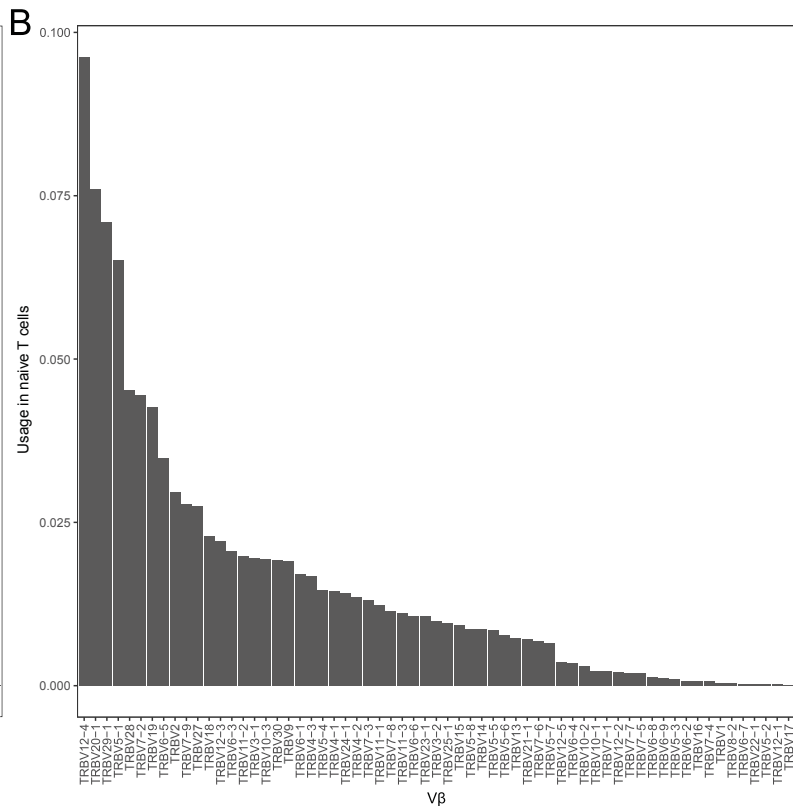

Figure S4 Usage of TCR-Vβ in normal effector T (A) and naive T cells (B).

**Table S1 List of samples used in this study.**

| <b>Sample ID</b> | <b>Subtype</b>      | <b>Read Count (Millions)</b> | <b>Source</b>                  |
|------------------|---------------------|------------------------------|--------------------------------|
| AITL-1           | AITL                | 57.6                         | Palomero et al, 2014 (Ref. 14) |
| AITL-2           | AITL                | 69.5                         | Palomero et al, 2014 (Ref. 14) |
| AITL-3           | AITL                | 62.1                         | Palomero et al, 2014 (Ref. 14) |
| AITL-4           | AITL                | 68.2                         | Palomero et al, 2014 (Ref. 14) |
| AITL-5           | AITL                | 62.8                         | Palomero et al, 2014 (Ref. 14) |
| AITL-6           | AITL                | 66.4                         | Palomero et al, 2014 (Ref. 14) |
| AITL-7           | AITL                | 74.7                         | Palomero et al, 2014 (Ref. 14) |
| AITL-8           | AITL                | 67.6                         | Palomero et al, 2014 (Ref. 14) |
| AITL-9           | AITL                | 114.1                        | Palomero et al, 2014 (Ref. 14) |
| AITL-10          | AITL                | 62.3                         | Palomero et al, 2014 (Ref. 14) |
| AITL-11          | AITL                | 68.4                         | Palomero et al, 2014 (Ref. 14) |
| AITL-12          | AITL                | 76.2                         | Yoo et al, 2014 (Ref. 13)      |
| AITL-13          | AITL                | 67.6                         | Yoo et al, 2014 (Ref. 13)      |
| AITL-14          | AITL                | 93.6                         | Yoo et al, 2014 (Ref. 13)      |
| AITL-15          | AITL                | 96.9                         | Yoo et al, 2014 (Ref. 13)      |
| AITL-16          | AITL                | 91.7                         | Yoo et al, 2014 (Ref. 13)      |
| AITL-17          | AITL                | 59.9                         | Yoo et al, 2014 (Ref. 13)      |
| AITL-18          | AITL                | 72.6                         | Yoo et al, 2014 (Ref. 13)      |
| AITL-19          | AITL                | 61.2                         | Yoo et al, 2014 (Ref. 13)      |
| AITL-20          | AITL                | 54.8                         | Yoo et al, 2014 (Ref. 13)      |
| AITL-21          | AITL                | 115.7                        | Rohr et al, 2015 (Ref. 11)     |
| AITL-22          | AITL                | 117.8                        | Rohr et al, 2015 (Ref. 11)     |
| AITL-23          | AITL                | 102.7                        | Rohr et al, 2015 (Ref. 11)     |
| AITL-24          | AITL                | 126.2                        | Rohr et al, 2015 (Ref. 11)     |
| AITL-25          | AITL                | 110.5                        | Rohr et al, 2015 (Ref. 11)     |
| AITL-26          | AITL                | 109.3                        | Rohr et al, 2015 (Ref. 11)     |
| AITL-27          | AITL                | 108.8                        | Rohr et al, 2015 (Ref. 11)     |
| AITL-28          | AITL                | 84.8                         | Rohr et al, 2015 (Ref. 11)     |
| AITL-29          | AITL                | 101.6                        | Rohr et al, 2015 (Ref. 11)     |
| AITL-30          | AITL                | 98.4                         | Rohr et al, 2015 (Ref. 11)     |
| AITL-31          | AITL                | 108.4                        | Rohr et al, 2015 (Ref. 11)     |
| AITL-32          | AITL                | 128.2                        | Rohr et al, 2015 (Ref. 11)     |
| AITL-33          | AITL                | 128.3                        | Rohr et al, 2015 (Ref. 11)     |
| AITL-34          | AITL                | 110.0                        | Rohr et al, 2015 (Ref. 11)     |
| AITL-35          | AITL                | 128.4                        | Rohr et al, 2015 (Ref. 11)     |
| AITL-36          | AITL                | 103.3                        | Rohr et al, 2015 (Ref. 11)     |
| AITL-37          | AITL                | 95.8                         | Rohr et al, 2015 (Ref. 11)     |
| AITL-38          | AITL                | 79.4                         | Rohr et al, 2015 (Ref. 11)     |
| AITL-39          | AITL                | 95.8                         | Rohr et al, 2015 (Ref. 11)     |
| AITL-40          | AITL                | 87.7                         | Rohr et al, 2015 (Ref. 11)     |
| gdTL             | $\gamma\delta$ -TCL | 92.9                         | New data                       |

|           |                    |       |                                 |
|-----------|--------------------|-------|---------------------------------|
| ALCL-1    | ALCL               | 43.0  | Crescenzo et al, 2015 (Ref. 15) |
| ALCL-2    | ALCL               | 47.2  | Crescenzo et al, 2015 (Ref. 15) |
| ALCL-3    | ALCL               | 38.6  | Crescenzo et al, 2015 (Ref. 15) |
| ALCL-4    | ALCL               | 54.4  | Crescenzo et al, 2015 (Ref. 15) |
| ALCL-5    | ALCL               | 42.7  | Crescenzo et al, 2015 (Ref. 15) |
| ALCL-6    | ALCL               | 31.7  | Crescenzo et al, 2015 (Ref. 15) |
| ALCL-7    | ALCL               | 39.9  | Crescenzo et al, 2015 (Ref. 15) |
| ALCL-8    | ALCL               | 58.1  | Crescenzo et al, 2015 (Ref. 15) |
| ALCL-9    | ALCL               | 53.7  | Crescenzo et al, 2015 (Ref. 15) |
| ALCL-10   | ALCL               | 42.5  | Crescenzo et al, 2015 (Ref. 15) |
| ALCL-11   | ALCL               | 60.0  | Crescenzo et al, 2015 (Ref. 15) |
| ALCL-12   | ALCL               | 63.4  | Crescenzo et al, 2015 (Ref. 15) |
| ALCL-13   | ALCL               | 64.6  | Crescenzo et al, 2015 (Ref. 15) |
| ALCL-14   | ALCL               | 67.4  | Crescenzo et al, 2015 (Ref. 15) |
| ALCL-15   | ALCL               | 69.0  | Crescenzo et al, 2015 (Ref. 15) |
| ALCL-16   | ALCL               | 28.2  | Crescenzo et al, 2015 (Ref. 15) |
| ALCL-17   | ALCL               | 26.1  | Crescenzo et al, 2015 (Ref. 15) |
| ALCL-18   | ALCL               | 31.7  | Crescenzo et al, 2015 (Ref. 15) |
| ALCL-19   | ALCL               | 32.3  | Crescenzo et al, 2015 (Ref. 15) |
| ALCL-20   | ALCL               | 34.8  | Crescenzo et al, 2015 (Ref. 15) |
| ALCL-21   | ALCL               | 29.6  | Crescenzo et al, 2015 (Ref. 15) |
| ALCL-22   | ALCL               | 32.2  | Crescenzo et al, 2015 (Ref. 15) |
| ALCL-23   | ALCL               | 54.5  | Crescenzo et al, 2015 (Ref. 15) |
| ALCL-24   | ALCL               | 56.2  | Palomero et al, 2014 (Ref. 14)  |
| ALCL-25   | ALCL               | 57.5  | Palomero et al, 2014 (Ref. 14)  |
| ALCL-26   | ALCL               | 77.0  | Palomero et al, 2014 (Ref. 14)  |
| ALCL-27   | ALCL               | 73.5  | Palomero et al, 2014 (Ref. 14)  |
| ALCL-28   | ALCL               | 66.6  | Palomero et al, 2014 (Ref. 14)  |
| ALCL-29   | ALCL               | 68.8  | Palomero et al, 2014 (Ref. 14)  |
| ALCL-30   | ALCL               | 68.7  | Palomero et al, 2014 (Ref. 14)  |
| ALCL-31   | ALCL               | 68.2  | Palomero et al, 2014 (Ref. 14)  |
| ALCL-32   | ALCL               | 69.7  | Palomero et al, 2014 (Ref. 14)  |
| ALCL-33   | ALCL               | 71.7  | Palomero et al, 2014 (Ref. 14)  |
| ALCL-34   | ALCL               | 67.8  | Palomero et al, 2014 (Ref. 14)  |
| ALCL-35   | ALCL               | 61.5  | Palomero et al, 2014 (Ref. 14)  |
| Fe_PD     | ALCL cell line     | 91.3  | New data                        |
| Karpas299 | ALCL cell line     | 90.6  | New data                        |
| L82       | ALCL cell line     | 95.3  | New data                        |
| MAC1      | ALCL cell line     | 88.1  | New data                        |
| SUDHL1    | ALCL cell line     | 98.3  | New data                        |
| TS        | ALCL cell line     | 93.1  | New data                        |
| T-cell-1  | Naïve CD4+ T cells | 118.3 | Weinstein et al, 2014 (Ref. 16) |
| T-cell-2  | Naïve CD4+ T cells | 130.9 | Weinstein et al, 2014 (Ref. 16) |

|             |                            |       |                                 |
|-------------|----------------------------|-------|---------------------------------|
| T-cell-3    | Naïve CD4+ T cells         | 65.2  | Weinstein et al, 2014 (Ref. 16) |
| T-cell-4    | Naïve CD4+ T cells         | 70.4  | Weinstein et al, 2014 (Ref. 16) |
| T-cell-5    | Effector T cells           | 104.2 | Weinstein et al, 2014 (Ref. 16) |
| T-cell-6    | Effector T cells           | 71.1  | Weinstein et al, 2014 (Ref. 16) |
| T-cell-7    | Effector T cells           | 74.1  | Weinstein et al, 2014 (Ref. 16) |
| T-cell-8    | Follicular helper T cells  | 111.1 | Weinstein et al, 2014 (Ref. 16) |
| T-cell-9    | Follicular helper T cells  | 118.8 | Weinstein et al, 2014 (Ref. 16) |
| T-cell-10   | Follicular helper T cells  | 84.5  | Weinstein et al, 2014 (Ref. 16) |
| NKCL-1      | NK cell lymphoma           | 97.9  | Kucuk et al, 2015 (Ref. 12)     |
| NKCL-2      | NK cell lymphoma           | 96.5  | Kucuk et al, 2015 (Ref. 12)     |
| NKCL-3      | NK cell lymphoma           | 104.1 | Kucuk et al, 2015 (Ref. 12)     |
| NKCL-4      | NK cell lymphoma           | 88.3  | Kucuk et al, 2015 (Ref. 12)     |
| NKCL-5      | NK cell lymphoma           | 97.7  | Kucuk et al, 2015 (Ref. 12)     |
| NKCL-6      | NK cell lymphoma           | 105.6 | Kucuk et al, 2015 (Ref. 12)     |
| NKCL-7      | NK cell lymphoma           | 97.3  | Kucuk et al, 2015 (Ref. 12)     |
| NKCL-8      | NK cell lymphoma           | 115.8 | Kucuk et al, 2015 (Ref. 12)     |
| NKCL-10     | NK cell lymphoma           | 94.0  | Kucuk et al, 2015 (Ref. 12)     |
| NKCL-11     | NK cell lymphoma           | 102.5 | Kucuk et al, 2015 (Ref. 12)     |
| NKCL-12     | NK cell lymphoma           | 98.2  | Kucuk et al, 2015 (Ref. 12)     |
| NKCL-13     | NK cell lymphoma           | 104.1 | Kucuk et al, 2015 (Ref. 12)     |
| NKCL-14     | NK cell lymphoma           | 97.8  | Kucuk et al, 2015 (Ref. 12)     |
| NKCL-16     | NK cell lymphoma           | 124.8 | Kucuk et al, 2015 (Ref. 12)     |
| NKCL-17     | NK cell lymphoma           | 112.6 | Kucuk et al, 2015 (Ref. 12)     |
| KHYG1       | NK cell lymphoma cell line | 79.1  | Kucuk et al, 2015 (Ref. 12)     |
| NKYS        | NK cell lymphoma cell line | 129.4 | Kucuk et al, 2015 (Ref. 12)     |
| PMIG-NK92   | NK cell lymphoma cell line | 96.9  | Kucuk et al, 2015 (Ref. 12)     |
| PRDM1-NK92  | NK cell lymphoma cell line | 99.7  | Kucuk et al, 2015 (Ref. 12)     |
| NK-cell-1   | Normal NK cells            | 89.7  | Weinstein et al, 2014 (Ref. 16) |
| NK-cell-2   | Normal NK cells            | 124.2 | Weinstein et al, 2014 (Ref. 16) |
| NK-cell-3   | Normal NK cells            | 112.3 | Weinstein et al, 2014 (Ref. 16) |
| PTCL-NOS-1  | PTCL, NOS                  | 66.0  | Palomero et al, 2014 (Ref. 14)  |
| PTCL-NOS-2  | PTCL, NOS                  | 66.5  | Palomero et al, 2014 (Ref. 14)  |
| PTCL-NOS-3  | PTCL, NOS                  | 64.6  | Palomero et al, 2014 (Ref. 14)  |
| PTCL-NOS-4  | PTCL, NOS                  | 65.2  | Palomero et al, 2014 (Ref. 14)  |
| PTCL-NOS-5  | PTCL, NOS                  | 60.5  | Palomero et al, 2014 (Ref. 14)  |
| PTCL-NOS-6  | PTCL, NOS                  | 62.9  | Palomero et al, 2014 (Ref. 14)  |
| PTCL-NOS-7  | PTCL, NOS                  | 66.7  | Palomero et al, 2014 (Ref. 14)  |
| PTCL-NOS-8  | PTCL, NOS                  | 83.4  | Palomero et al, 2014 (Ref. 14)  |
| PTCL-NOS-9  | PTCL, NOS                  | 67.0  | Palomero et al, 2014 (Ref. 14)  |
| PTCL-NOS-10 | PTCL, NOS                  | 68.5  | Palomero et al, 2014 (Ref. 14)  |
| PTCL-NOS-11 | PTCL, NOS                  | 116.4 | New data                        |
| PTCL-NOS-12 | PTCL, NOS                  | 136.5 | New data                        |
| PTCL-NOS-13 | PTCL, NOS                  | 151.7 | New data                        |



|             |           |       |          |
|-------------|-----------|-------|----------|
| PTCL-NOS-14 | PTCL, NOS | 137.0 | New data |
| PTCL-NOS-15 | PTCL, NOS | 120.2 | New data |
| PTCL-NOS-16 | PTCL, NOS | 155.9 | New data |
| PTCL-NOS-17 | PTCL, NOS | 125.5 | New data |

**Table S2 Clonal assessment based on TCR CDR3 sequences and variable segment usage.**

| Case ID | TCR $\alpha$            |            | TCR $\beta$            |            | Clonality based on CDR3 | V $\alpha$ ratio | V $\beta$ ratio | Clonality based on V-usage | CDR3 & V-usage concordance |
|---------|-------------------------|------------|------------------------|------------|-------------------------|------------------|-----------------|----------------------------|----------------------------|
|         | Dominant TCR $\alpha$ % | CDR3 ratio | Dominant TCR $\beta$ % | CDR3 ratio |                         |                  |                 |                            |                            |
| AITL-1  | 14%                     | 4.0        | 17%                    | 4.5        | Monoclonal              | 4.0              | 2.3             | Polyclonal                 | No                         |
| AITL-10 | 40%                     | 10.7       | 58%                    | 88.8       | Monoclonal              | 63.2             | 28.7            | Monoclonal                 | Yes                        |
| AITL-11 | 69%                     | 115.7      | 80%                    | 165.1      | Monoclonal              | 41.9             | 24.1            | Monoclonal                 | Yes                        |
| AITL-12 | 30%                     | 10.2       | 74%                    | 170.5      | Monoclonal              | 2.9              | 44.8            | Monoclonal                 | Yes                        |
| AITL-13 | 41%                     | 12.9       | 44%                    | 122.4      | Monoclonal              | 21.8             | 12.5            | Monoclonal                 | Yes                        |
| AITL-14 | 2%                      | 2.1        | 4%                     | 5.6        | Polyclonal              | 3.0              | 3.1             | Polyclonal                 | Yes                        |
| AITL-15 | 24%                     | 10.9       | 1%                     | 2.3        | Monoclonal              | 15.3             | 2.5             | Monoclonal                 | Yes                        |
| AITL-16 | 14%                     | 7.9        | 29%                    | 16.7       | Monoclonal              | 7.6              | 5.9             | Polyclonal                 | No                         |
| AITL-17 | 9%                      | 4.5        | 5%                     | 3.8        | Polyclonal              | 3.3              | 3.2             | Polyclonal                 | Yes                        |
| AITL-18 | 29%                     | 8.9        | 73%                    | 120.9      | Monoclonal              | 30.7             | 54.5            | Monoclonal                 | Yes                        |
| AITL-19 | 58%                     | 46.0       | 37%                    | 8.2        | Monoclonal              | 19.2             | 8.9             | Monoclonal                 | Yes                        |
| AITL-2  | 31%                     | 14.2       | 42%                    | 34.4       | Monoclonal              | 14.2             | 19.7            | Monoclonal                 | Yes                        |
| AITL-20 | 21%                     | 12.7       | 47%                    | 70.3       | Monoclonal              | 6.2              | 14.1            | Monoclonal                 | Yes                        |
| AITL-21 | 71%                     | 19.8       | 95%                    | 180.3      | Monoclonal              | 31.1             | 41.9            | Monoclonal                 | Yes                        |
| AITL-22 | 36%                     | 24.1       | 21%                    | 19.7       | Monoclonal              | 10.1             | 9.2             | Monoclonal                 | Yes                        |
| AITL-23 | 48%                     | 23.2       | 80%                    | 150.0      | Monoclonal              | 7.1              | 5.5             | Polyclonal                 | No                         |
| AITL-24 | 24%                     | 18.4       | 81%                    | 303.3      | Monoclonal              | 6.9              | 43.2            | Monoclonal                 | Yes                        |
| AITL-25 | 39%                     | 17.0       | 53%                    | 19.2       | Monoclonal              | 9.2              | 15.2            | Monoclonal                 | Yes                        |
| AITL-26 | 4%                      | 3.0        | 10%                    | 4.7        | Polyclonal              | 2.2              | 7.6             | Polyclonal                 | Yes                        |
| AITL-27 | 69%                     | 27.9       | 90%                    | 160.5      | Monoclonal              | 19.2             | 93.9            | Monoclonal                 | Yes                        |
| AITL-28 | 79%                     | 11.5       | 92%                    | 90.0       | Monoclonal              | 18.7             | 48.0            | Monoclonal                 | Yes                        |
| AITL-29 | 67%                     | 17.2       | 81%                    | 74.5       | Monoclonal              | 18.3             | 47.5            | Monoclonal                 | Yes                        |
| AITL-3  | 15%                     | 18.6       | 3%                     | 2.7        | Monoclonal              | 4.0              | 3.8             | Polyclonal                 | No                         |
| AITL-30 | 3%                      | 5.0        | 1%                     | 2.0        | Polyclonal              | 3.5              | 6.5             | Polyclonal                 | Yes                        |
| AITL-31 | 10%                     | 4.2        | 42%                    | 14.6       | Monoclonal              | 2.2              | 11.9            | Monoclonal                 | Yes                        |
| AITL-32 | 46%                     | 61.8       | 4%                     | 5.3        | Monoclonal              | 13.5             | 30.1            | Monoclonal                 | Yes                        |
| AITL-33 | 5%                      | 4.5        | 34%                    | 37.1       | Monoclonal              | 2.8              | 11.0            | Monoclonal                 | Yes                        |
| AITL-34 | 47%                     | 24.7       | 34%                    | 7.0        | Monoclonal              | 6.3              | 6.7             | Polyclonal                 | No                         |
| AITL-35 | 35%                     | 5.0        | 62%                    | 36.7       | Monoclonal              | 16.5             | 21.4            | Monoclonal                 | Yes                        |
| AITL-36 | 8%                      | 4.7        | 16%                    | 7.6        | Monoclonal              | 2.4              | 5.9             | Polyclonal                 | No                         |
| AITL-37 | 60%                     | 29.9       | 12%                    | 3.4        | Monoclonal              | 15.4             | 5.7             | Monoclonal                 | Yes                        |
| AITL-38 | 43%                     | 63.9       | 61%                    | 44.8       | Monoclonal              | 23.4             | 23.7            | Monoclonal                 | Yes                        |
| AITL-39 | 77%                     | 103.1      | 78%                    | 124.7      | Monoclonal              | 52.8             | 21.9            | Monoclonal                 | Yes                        |
| AITL-4  | 11%                     | 2.8        | 9%                     | 2.2        | Monoclonal              | 3.1              | 3.9             | Polyclonal                 | No                         |
| AITL-40 | 55%                     | 34.1       | 66%                    | 71.9       | Monoclonal              | 12.8             | 65.0            | Monoclonal                 | Yes                        |
| AITL-5  | 38%                     | 17.6       | 80%                    | 97.8       | Monoclonal              | 5.3              | 44.9            | Monoclonal                 | Yes                        |
| AITL-6  | 74%                     | 26.8       | 7%                     | 2.6        | Monoclonal              | 23.2             | 6.6             | Monoclonal                 | Yes                        |
| AITL-7  | 11%                     | 14.3       | 5%                     | 6.9        | Monoclonal              | 6.0              | 5.7             | Polyclonal                 | No                         |
| AITL-8  | 33%                     | 18.9       | 9%                     | 2.4        | Monoclonal              | 2.6              | 5.1             | Polyclonal                 | No                         |
| AITL-9  | 90%                     | 65.1       | 22%                    | 10.3       | Monoclonal              | 10.7             | 18.7            | Monoclonal                 | Yes                        |
| ALCL-1  | 98%                     | 447.5      | 99%                    | 364.0      | Monoclonal              | 42.4             | 70.0            | Monoclonal                 | Yes                        |
| ALCL-12 | 1%                      | 3.3        | 1%                     | 2.6        | Polyclonal              | 3.8              | 4.8             | Polyclonal                 | Yes                        |
| ALCL-16 | 60%                     | 24.9       | 81%                    | 105.7      | Monoclonal              | 40.2             | 186.2           | Monoclonal                 | Yes                        |
| ALCL-17 | 67%                     | 74.5       | 80%                    | 52.3       | Monoclonal              | 27.3             | 42.5            | Monoclonal                 | Yes                        |
| ALCL-18 | 73%                     | 54.0       | 62%                    | 51.0       | Monoclonal              | 20.3             | 47.5            | Monoclonal                 | Yes                        |
| ALCL-19 | 2%                      | 3.5        | 1%                     | 3.0        | Polyclonal              | 2.5              | 3.6             | Polyclonal                 | Yes                        |
| ALCL-20 | 37%                     | 9.9        | 18%                    | 10.5       | Monoclonal              | 2.0              | 3.9             | Polyclonal                 | No                         |
| ALCL-21 | 52%                     | 83.7       | 73%                    | 147.8      | Monoclonal              | 2.4              | 23.2            | Monoclonal                 | Yes                        |
| ALCL-23 | 24%                     | 9.1        | 56%                    | 80.5       | Monoclonal              | 3.0              | 31.4            | Monoclonal                 | Yes                        |
| ALCL-24 | 94%                     | 153.0      | 94%                    | 23.4       | Monoclonal              | 55.5             | 16.5            | Monoclonal                 | Yes                        |
| ALCL-25 | 34%                     | 43.3       | 3%                     | 4.5        | Monoclonal              | 65.6             | 2.8             | Monoclonal                 | Yes                        |
| ALCL-26 | 4%                      | 3.0        | 69%                    | 62.0       | Monoclonal              | 2.3              | 36.5            | Monoclonal                 | Yes                        |
| ALCL-27 | 56%                     | 11.5       | 62%                    | 30.2       | Monoclonal              | 22.1             | 12.0            | Monoclonal                 | Yes                        |
| ALCL-28 | 4%                      | 3.4        | 11%                    | 5.3        | Monoclonal              | 3.0              | 3.5             | Polyclonal                 | No                         |
| ALCL-29 | 69%                     | 14.7       | 92%                    | 643.6      | Monoclonal              | 174.7            | 131.5           | Monoclonal                 | Yes                        |
| ALCL-32 | 1%                      | 2.6        | 1%                     | 2.2        | Polyclonal              | 3.1              | 2.6             | Polyclonal                 | Yes                        |
| ALCL-34 | 3%                      | 3.4        | 1%                     | 2.4        | Polyclonal              | 2.4              | 2.5             | Polyclonal                 | Yes                        |

|             |     |       |      |                    |       |                    |     |
|-------------|-----|-------|------|--------------------|-------|--------------------|-----|
| ALCL-35     | 91% | 190.8 | 7%   | 2.8 Monoclonal     | 10.3  | 2.4 Monoclonal     | Yes |
| ALCL-5      | 84% | 92.4  | 83%  | 60.3 Monoclonal    | 78.4  | 89.9 Monoclonal    | Yes |
| ALCL-6      | 10% | 5.3   | 11%  | 3.8 Monoclonal     | 3.3   | 6.1 Polyclonal     | No  |
| ALCL-8      | 85% | 54.4  | 70%  | 17.6 Monoclonal    | 12.6  | 6.2 Monoclonal     | Yes |
| ALCL-9      | 66% | 3.4   | 51%  | 3.0 Monoclonal     | 2.8   | 4.0 Polyclonal     | No  |
| L82         | 88% | 15.0  | 100% | 1499.0 Monoclonal  | 2.5   | 2057.7 Monoclonal  | Yes |
| PTCL-NOS-1  | 53% | 19.7  | 52%  | 59.8 Monoclonal    | 12.7  | 8.4 Monoclonal     | Yes |
| PTCL-NOS-10 | 50% | 155.3 | 60%  | 97.7 Monoclonal    | 6.2   | 4.6 Polyclonal     | No  |
| PTCL-NOS-11 | 95% | 361.4 | 89%  | 144.2 Monoclonal   | 7.5   | 319.9 Monoclonal   | Yes |
| PTCL-NOS-13 | 95% | 578.5 | 96%  | 167.1 Monoclonal   | 262.5 | 8.8 Monoclonal     | Yes |
| PTCL-NOS-14 | 3%  | 2.3   | 5%   | 2.5 Polyclonal     | 3.9   | 6.6 Polyclonal     | Yes |
| PTCL-NOS-15 | 42% | 5.8   | 46%  | 7.4 Monoclonal     | 2.5   | 21.8 Monoclonal    | Yes |
| PTCL-NOS-16 | 42% | 5.4   | 74%  | 34.7 Monoclonal    | 7.6   | 26.4 Monoclonal    | Yes |
| PTCL-NOS-17 | 3%  | 2.4   | 2%   | 2.9 Polyclonal     | 3.4   | 9.5 Polyclonal     | Yes |
| PTCL-NOS-2  | 14% | 22.6  | 3%   | 3.7 Monoclonal     | 12.3  | 3.8 Monoclonal     | Yes |
| PTCL-NOS-3  | 18% | 24.4  | 18%  | 6.5 Monoclonal     | 9.4   | 5.3 Polyclonal     | No  |
| PTCL-NOS-4  | 14% | 25.6  | 8%   | 4.5 Monoclonal     | 8.0   | 4.4 Polyclonal     | No  |
| PTCL-NOS-5  | 7%  | 3.9   | 8%   | 4.5 Polyclonal     | 3.7   | 3.7 Polyclonal     | Yes |
| PTCL-NOS-7  | 20% | 42.5  | 20%  | 26.2 Monoclonal    | 7.0   | 13.9 Monoclonal    | Yes |
| PTCL-NOS-9  | 77% | 23.7  | 65%  | 8.1 Monoclonal     | 2.7   | 20.1 Monoclonal    | Yes |
| T-cell-1    | 0%  | 2.0   | 0%   | 2.3 Normal T cells | 2.6   | 3.8 Normal T cells | Yes |
| T-cell-10   | 2%  | 2.9   | 2%   | 2.4 Normal T cells | 2.5   | 3.9 Normal T cells | Yes |
| T-cell-2    | 0%  | 2.0   | 0%   | 2.0 Normal T cells | 2.1   | 3.7 Normal T cells | Yes |
| T-cell-3    | 0%  | 2.0   | 0%   | 2.0 Normal T cells | 2.3   | 3.1 Normal T cells | Yes |
| T-cell-4    | 1%  | 2.3   | 0%   | 2.4 Normal T cells | 2.1   | 4.7 Normal T cells | Yes |
| T-cell-5    | 0%  | 2.8   | 0%   | 3.0 Normal T cells | 2.5   | 2.8 Normal T cells | Yes |
| T-cell-6    | 1%  | 2.2   | 1%   | 2.4 Normal T cells | 2.5   | 5.2 Normal T cells | Yes |
| T-cell-7    | 0%  | 2.3   | 0%   | 2.4 Normal T cells | 2.7   | 3.0 Normal T cells | Yes |
| T-cell-8    | 1%  | 2.5   | 1%   | 2.7 Normal T cells | 2.2   | 4.5 Normal T cells | Yes |
| T-cell-9    | 1%  | 2.4   | 1%   | 2.6 Normal T cells | 2.2   | 3.5 Normal T cells | Yes |

**Table S3 List of samples with biallelic TCR strands.**

| Original ID | Chain        | C1%    | C2%    | C3%   | C1/C2 Ratio | C2/C3 Ratio | Out-of-frame allele |
|-------------|--------------|--------|--------|-------|-------------|-------------|---------------------|
| AITL-2      | TCR $\alpha$ | 15.62% | 15.11% | 2.17% | 1.0         | 7.0         | No                  |
| AITL-11     | TCR $\alpha$ | 51.98% | 16.60% | 0.59% | 3.1         | 28.0        | Yes                 |
| AITL-19     | TCR $\alpha$ | 47.04% | 11.19% | 1.27% | 4.2         | 8.8         | Yes                 |
| AITL-22     | TCR $\beta$  | 14.67% | 6.40%  | 1.07% | 2.3         | 6.0         | No                  |
| AITL-23     | TCR $\beta$  | 70.74% | 9.04%  | 0.53% | 7.8         | 17.0        | Yes                 |
| AITL-24     | TCR $\alpha$ | 12.43% | 11.50% | 1.30% | 1.1         | 8.9         | Yes                 |
| AITL-27     | TCR $\alpha$ | 54.55% | 14.60% | 2.48% | 3.7         | 5.9         | Yes                 |
| AITL-32     | TCR $\alpha$ | 31.30% | 14.44% | 0.74% | 2.2         | 19.5        | Yes                 |
| AITL-34     | TCR $\alpha$ | 24.63% | 22.11% | 1.89% | 1.1         | 11.7        | No                  |
| AITL-37     | TCR $\alpha$ | 38.65% | 21.80% | 2.02% | 1.8         | 10.8        | No                  |
| AITL-39     | TCR $\alpha$ | 71.88% | 5.12%  | 0.75% | 14.0        | 6.9         | Yes                 |
| AITL-39     | TCR $\beta$  | 73.96% | 3.67%  | 0.62% | 20.2        | 5.9         | Yes                 |
| ALCL-8      | TCR $\alpha$ | 63.81% | 20.82% | 1.56% | 3.1         | 13.4        | No                  |
| ALCL-16     | TCR $\alpha$ | 41.28% | 18.56% | 2.40% | 2.2         | 7.7         | Yes                 |
| ALCL-18     | TCR $\alpha$ | 63.51% | 9.46%  | 1.35% | 6.7         | 7.0         | Yes                 |
| ALCL-24     | TCR $\alpha$ | 87.96% | 5.71%  | 0.61% | 15.4        | 9.3         | Yes                 |
| ALCL-27     | TCR $\beta$  | 40.33% | 21.25% | 2.04% | 1.9         | 10.4        | No                  |
| ALCL-35     | TCR $\alpha$ | 88.20% | 3.11%  | 0.48% | 28.4        | 6.5         | Yes                 |
| PTCL-NOS-1  | TCR $\alpha$ | 30.60% | 22.57% | 2.70% | 1.4         | 8.3         | No                  |
| PTCL-NOS-1  | TCR $\beta$  | 28.09% | 23.70% | 0.87% | 1.2         | 27.4        | No                  |
| PTCL-NOS-7  | TCR $\alpha$ | 16.84% | 3.26%  | 0.47% | 5.2         | 6.9         | Yes                 |
| PTCL-NOS-11 | TCR $\alpha$ | 91.22% | 3.40%  | 0.26% | 26.8        | 13.0        | Yes                 |
| PTCL-NOS-13 | TCR $\alpha$ | 90.57% | 4.09%  | 0.16% | 22.1        | 25.0        | Yes                 |
| PTCL-NOS-13 | TCR $\beta$  | 82.60% | 13.00% | 0.57% | 6.4         | 22.7        | Yes                 |
